# Supplementary material for: Metabolic control and incidence of hypoglycaemia, hospitalisation and complications among Saudi patients with type 2 diabetes initiating second-line therapy: an analysis of the Saudi Arabia data from the DISCOVER Observational Study programme
Source: HighWire-hosted journal article supplement (doi:10.1136/bmjopen-2022-063586), 2023-08-01
Supplement: bmjopen-2022-063586supp002_data_supplement.pdf [file bmjopen-2022-063586supp002_data_supplement.pdf]

## Appendix 2. Baseline characteristics of the studied Saudi cohort of DISCOVER study.

| Variables                                  | Baseline data for 519 patients |
|--------------------------------------------|--------------------------------|
| Mean age (years) (SD)                      | 52.4 ( $\pm$ 11.0)             |
| Gender n(%)                                |                                |
| Males                                      | 284 (54.7)                     |
| Females                                    | 235 (45.3)                     |
| Any Macrovascular Disease n (%)            | 57 (11)                        |
| Coronary artery disease n (%)              | 38 (7.3)                       |
| Myocardial infarction n (%)                | 8 (1.5)                        |
| Angina n (%)                               | 12 (2.3%)                      |
| Atrial fibrillation event                  | 4 (0.8)                        |
| Heart failure n (%)                        | 8 (1.5)                        |
| Peripheral vascular disease n (%)          | 0 (0)                          |
| Stroke n (%)                               | 12 (2.3)                       |
| TIA n (%)                                  | 6(1.2)                         |
| Chronic Kidney Disease n (%)               | 7 (4)                          |
| Albuminuria                                | 16 (3.1)                       |
| Retinopathy n (%)                          | 22 (4.3)                       |
| Peripheral neuropathy n (%)                | 59 (11)                        |
| Autonomic neuropathy n(%)                  | 35 (6.8)                       |
| Hypertension n (%)                         | 196 (37.8)                     |
| Hyperlipidemia n (%)                       | 226 (43.5)                     |
| First-line hypoglycemic medications n (%)  |                                |
| Biguanides                                 | 463 (89.2)                     |
| Sulfonylurea                               | 246 (47.5)                     |
| DPP-4 inhibitors                           | 48 (9.3)                       |
| Thiazolidinedione/ glitazones              | 2 (0.4)                        |
| Second-line hypoglycemic medications n (%) |                                |
| Biguanides                                 | 475 (91.5)                     |
| Sulfonylurea                               | 232 (51.2)                     |
| DPP-4 inhibitors                           | 384 (73.9)                     |
| Thiazolidinedione/ glitazones              | 24 (4.6)                       |
| Alph-glucosidase inhibitors                | 5 (1)                          |
| Meglitinides/Glinides                      | 3 (0.6)                        |
| Incretin mimetics/GLP1                     | 4 (0.8)                        |
| Insulin                                    | 46 (8.9)                       |
