# Supplementary material for: Metabolic control and incidence of hypoglycaemia, hospitalisation and complications among Saudi patients with type 2 diabetes initiating second-line therapy: an analysis of the Saudi Arabia data from the DISCOVER Observational Study programme
Source: HighWire-hosted journal article supplement (doi:10.1136/bmjopen-2022-063586), 2023-08-01

Appendix 5. The annual incidence of clinical events related to various conditions during the three-year follow-up period

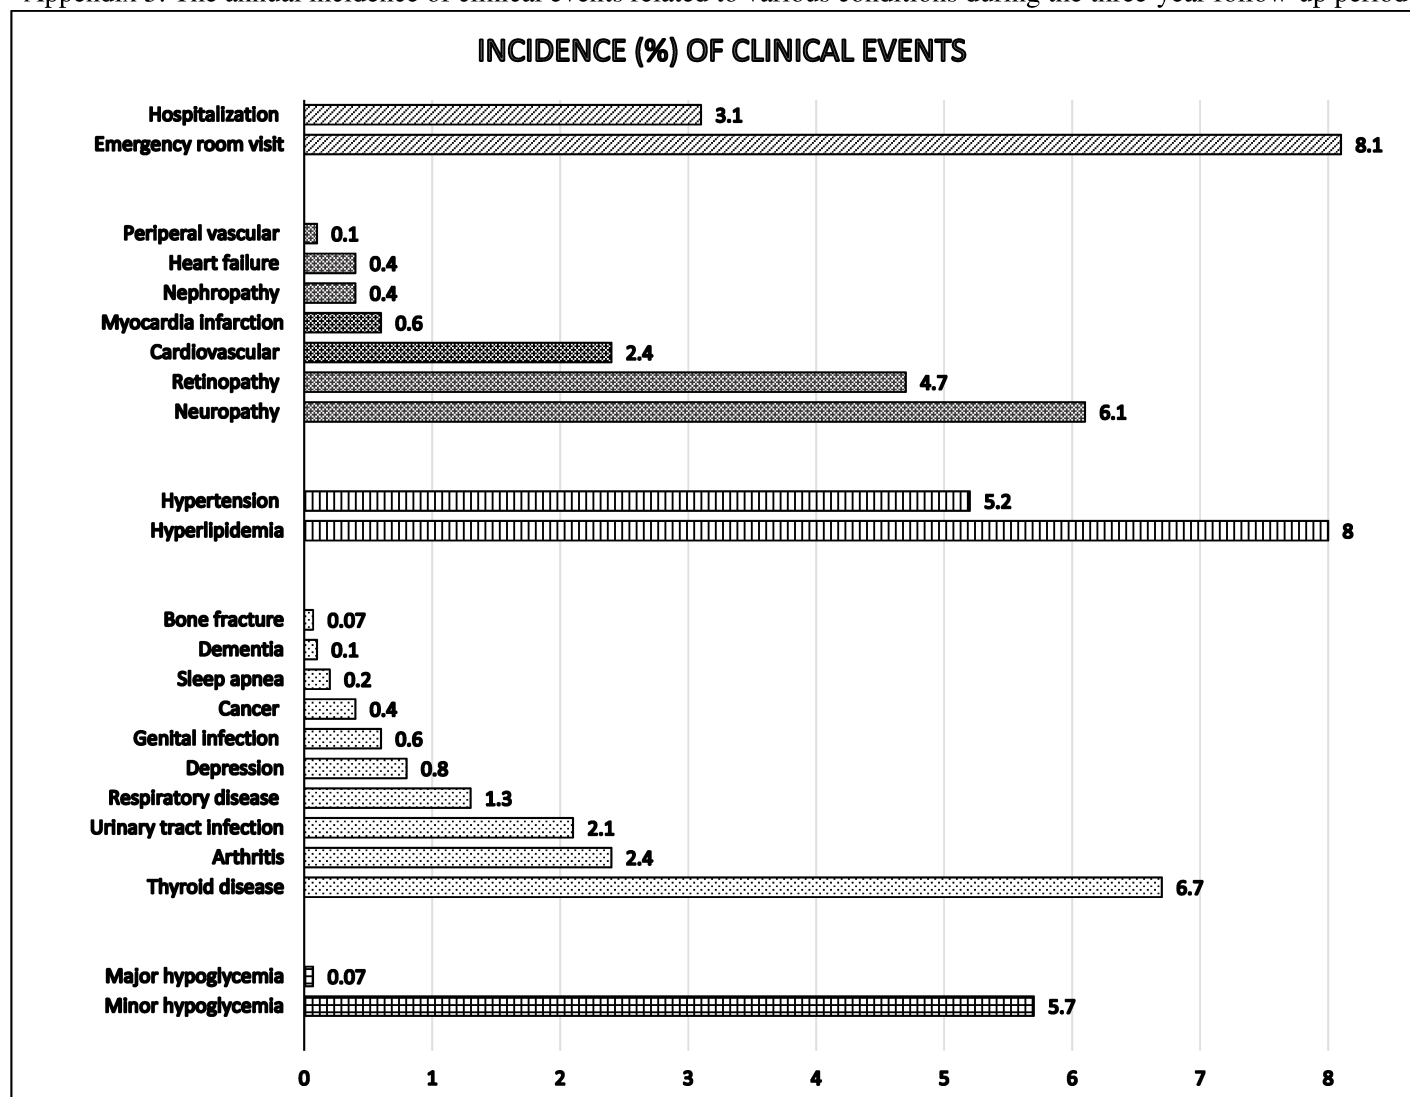

Supplement: bmjopen-2022-063586supp005_data_supplement.pdf [file bmjopen-2022-063586supp005_data_supplement.pdf]
